# Supplementary material for: MgrB-Dependent Colistin Resistance in Klebsiella pneumoniae Is Associated with an Increase in Host-to-Host Transmission
Source: PubMed Central journal article supplement (PMC9040857; doi:10.1128/mbio.03595-21), 2022-03-21

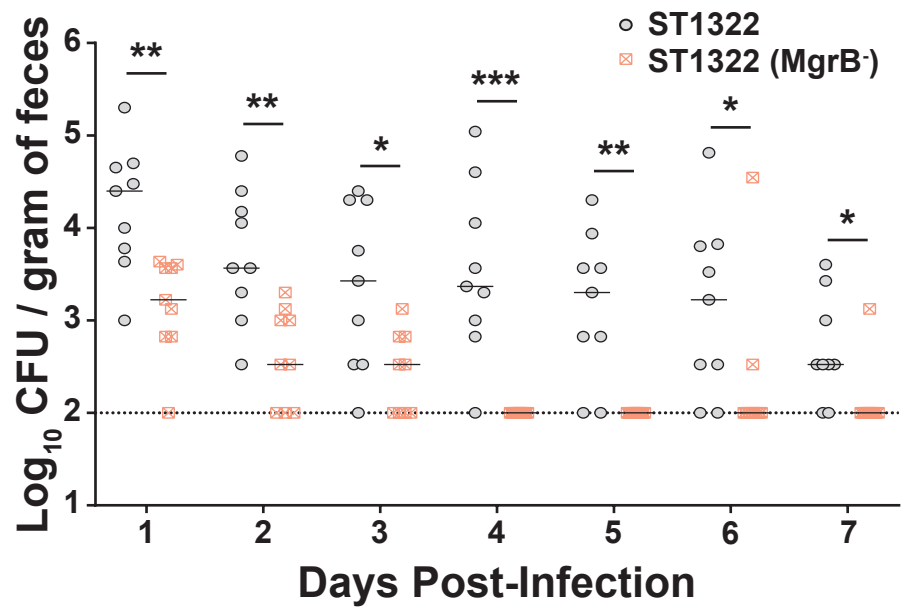

Supplement: mbio.03595-21-sf002.pdf [file mbio.03595-21-sf002.pdf]
